# Supplementary material for: Trends in gynecologic cancer mortality in East Asian regions
Source: PubMed Central journal article supplement — J Gynecol Oncol. 2014 Jul 3;25(3):174–82. doi: 10.3802/jgo.2014.25.3.174 (PMC4102735; doi:10.3802/jgo.2014.25.3.174), 2014-07-03
Supplement: jgo-25-174-s001.pdf [file jgo-25-174-s001.pdf]

**Suppl. Table 1.** Estimated annual percentage change of cervical cancer death rates, with 95% CIs

| Age (yr) | Trend 1   |       |            | Trend 2   |       |            |
|----------|-----------|-------|------------|-----------|-------|------------|
|          | Year      | APC   | 95% CI     | Year      | APC   | 95% CI     |
| 20–34    | 1993–2004 | –6.8* | –9.4, –4.1 | 2004–2010 | 6.4   | –2.6, 16.2 |
| 35–49    | 1993–2010 | –6.0* | –6.8, –5.2 |           |       |            |
| 50–69    | 1993–2010 | –6.6* | –7.2, –6.0 |           |       |            |
| 70+      | 1993–2003 | 2.7*  | 0.7, 4.8   | 2003–2010 | –6.1* | –8.7, –3.5 |

APC, annual percentage change; CI, confidence interval.

\*The APC is significantly different from zero at  $\alpha=0.05$ .
