# Supplementary material for: Trends in gynecologic cancer mortality in East Asian regions
Source: PubMed Central journal article supplement — J Gynecol Oncol. 2014 Jul 3;25(3):174–82. doi: 10.3802/jgo.2014.25.3.174 (PMC4102735; doi:10.3802/jgo.2014.25.3.174), 2014-07-03
Supplement: jgo-25-174-s002.pdf [file jgo-25-174-s002.pdf]

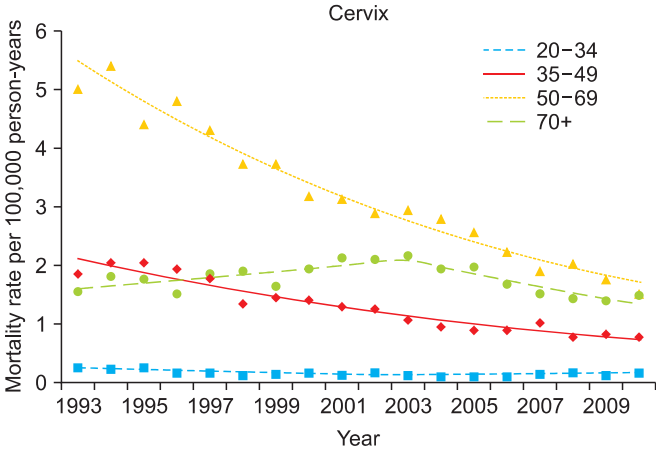

Suppl. Fig. 1. Corrected trends of age-standardized cervical cancer mortality rates in different age groups in Korea.
