# Supplementary material for: Trends in gynecologic cancer mortality in East Asian regions
Source: PubMed Central journal article supplement — J Gynecol Oncol. 2014 Jul 3;25(3):174–82. doi: 10.3802/jgo.2014.25.3.174 (PMC4102735; doi:10.3802/jgo.2014.25.3.174), 2014-07-03
Supplement: jgo-25-174-s003.pdf [file jgo-25-174-s003.pdf]

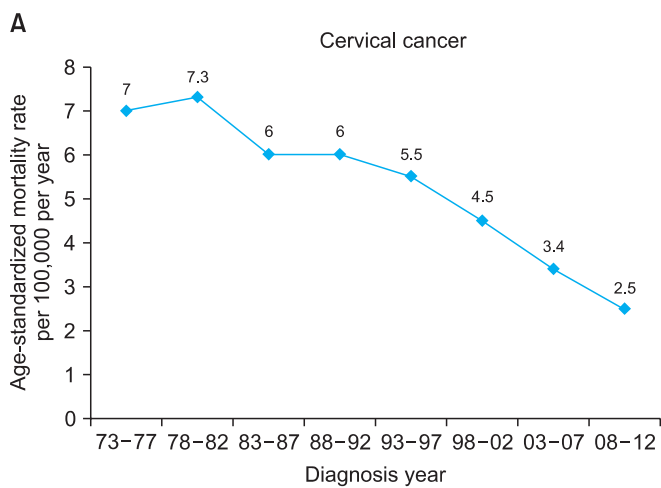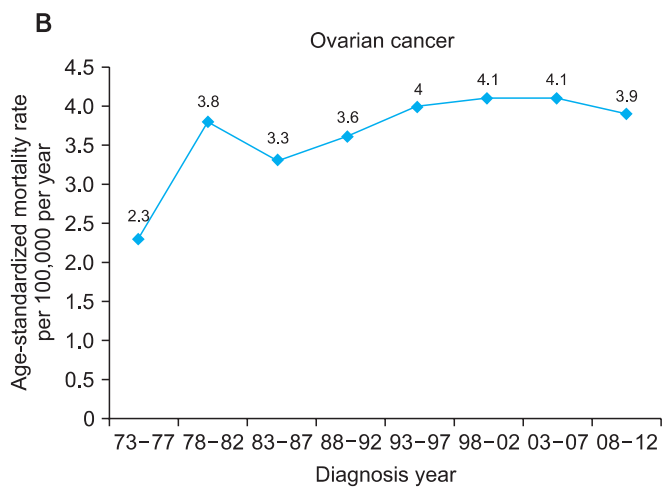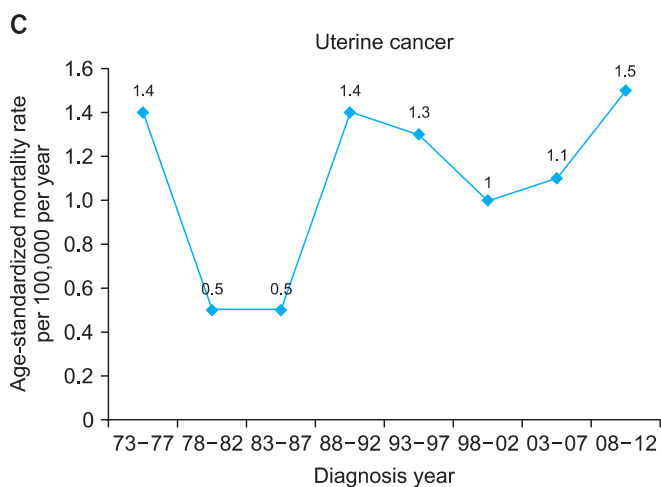

**Suppl. Fig. 2.** Age-standardized mortality rates for gynecologic cancer in Singapore, 1973 to 2012. (A) Cervical cancer. (B) Ovarian cancer. (C) Uterine cancer.
